# Supplementary material for: IM-TORNADO: A Tool for Comparison of 16S Reads from Paired-End Libraries
Source: PubMed Central journal article supplement (PMC4266640; doi:10.1371/journal.pone.0114804), 2014-12-15
Supplement: pone.0114804.s001.pdf [file pone.0114804.s001.pdf]

| Library type                            | Domain | Phylum | Class | Order | Family | Genus | Species |
|-----------------------------------------|--------|--------|-------|-------|--------|-------|---------|
| Paired (error-free, 2x250 bp)           | 100.0  | 99.95  | 99.91 | 99.59 | 98.25  | 94.32 | 90.78   |
| Paired (error-free, 2x200 bp)           | 100.0  | 99.95  | 99.90 | 99.52 | 97.84  | 93.47 | 89.14   |
| Paired (error-free, 2x150 bp)           | 100.0  | 99.94  | 99.87 | 99.41 | 97.61  | 92.59 | 88.15   |
| Paired (error-free, 2x100 bp)           | 100.0  | 99.91  | 99.80 | 99.11 | 96.85  | 90.43 | 83.75   |
| Paired (with errors, 2x250 bp)          | 100.0  | 99.84  | 99.67 | 98.26 | 96.19  | 88.48 | 80.25   |
| Paired (trimmed, with errors, 2x250 bp) | 100.0  | 99.91  | 99.84 | 99.14 | 97.71  | 92.73 | 87.73   |
