# Supplementary material for: IM-TORNADO: A Tool for Comparison of 16S Reads from Paired-End Libraries
Source: PubMed Central journal article supplement (PMC4266640; doi:10.1371/journal.pone.0114804), 2014-12-15
Supplement: pone.0114804.s002.pdf [file pone.0114804.s002.pdf]

| Library type | V3-V5 OTU counts<br>(mean $\pm$ std. dev.) | V6-V9 OTU counts<br>(mean $\pm$ std. dev.) |
|--------------|--------------------------------------------|--------------------------------------------|
| Paired       | 3172.0 $\pm$ 39.9                          | 3245.0 $\pm$ 38.2                          |
| R1           | 3589.4 $\pm$ 42.5                          | 3283.8 $\pm$ 32.2                          |
| R2           | 2782.4 $\pm$ 35.9                          | 3113.5 $\pm$ 34.5                          |
| Full length  | 3567.7 $\pm$ 42.5                          | 3483.8 $\pm$ 38.3                          |
